# Supplementary material for: Effects of equal-volume resistance training with different training frequencies in muscle size and strength in trained men
Source: PeerJ. 2018 Jun 22;6:e5020. doi: 10.7717/peerj.5020 (PMC6016534; doi:10.7717/peerj.5020)
Supplement: Supplemental Information 1 [file peerj-06-5020-s001.xlsx]

## Sheet: Data
	Group				Elbow flexors muscle thickness			Arm circumference			Elbow flexors PT			Elbow extensors PT
Name		Height	Age	Weight	Pre	Post	Delta	Pre	Post	Delta	Pre	Post	Delta	Pre	Post	Delta	Previsou experience (months)
1	1	182	20	88.5	31.9	34	0.0658307	35.2	36	0.0227273	47	46.7	-0.00638298	39.9	48.9	0.225564	12
2	1	168	19	68.3	33.1	34.8	0.0513595	36.0333	36.4333	0.0111008	60.9	58.5	-0.0394089	49.6	52.8	0.0645161	13
3	1	172.7	20	66.75	38.4	40.2	0.046875	34.3333	35.5333	0.0349515	71.7	71.4	-0.0041841	60.2	56.8	-0.0564784	12
4	1	175	23	69.85	37.9	38.8	0.0237467	34.7333	35.4333	0.0201536	62.4	64.1	0.0272436	59.3	56.4	-0.0489039	18
5	1	181.2	23	81.45	37	38	0.027027	36.5	36.9333	0.0118721	70.9	65.4	-0.077574	68.3	64.9	-0.0497804	12
6	1	177	25	63.65	31	30.3	-0.0225806	33.2	33.1333	-0.00200803	59.5	60.8	0.0218487	53.1	64.3	0.210923	12
7	1	172.3	23	105.05	41.1	42.5	0.0340633	42.7667	43.9	0.0265004	72	76.2	0.0583333	72	62.2	-0.136111	24
8	1	180	21	83.15	45.6	46.5	0.0197368	39.7	40.2333	0.0134341	88.2	84.6	-0.0408163	59.1	54.7	-0.0744501	12
9	2	182.6	23	99.95	39.9	40	0.00250627	37.9333	38.4667	0.0140598	93	88.3	-0.0505376	81.7	77.7	-0.0489596	12
10	2	174	20	71.05	38.3	38	-0.0078329	34.6333	34.3667	-0.00769971	64.4	59.7	-0.0729814	48.4	46.9	-0.0309917	14
11	2	177.3	22	81.6	33.4	36	0.0778443	34.5667	36.6	0.0588235	57.2	60.1	0.0506993	59	64.2	0.0881356	12
12	2	182.7	20	70.35	39	39	0	34.3333	33.2	-0.0330097	72.5	77.7	0.0717241	49.2	48	-0.0243902	12
13	2	172	24	72.55	28	28.5	0.0178571	33.4	34.4667	0.0319361	57.1	60.8	0.0647986	44.2	50.2	0.135747	36
14	2	187.5	23	88.15	38.3	38.8	0.0130548	39.4333	38.4333	-0.0253593	78.6	78.7	0.00127226	62.2	61.3	-0.0144695	24
15	2	175.3	25	75.35	31.1	31.1	0	34.4333	34.3333	-0.00290416	51	51.7	0.0137255	40.3	41.7	0.0347395	12
16	2	180	25	94.25	37.7	37.6	-0.00265252	35.9667	36.4333	0.012975	59.7	59.8	0.00167504	57.9	56.7	-0.0207254	12
